# Supplementary material for: Modelling accidental hypothermia effects on a human body under different pathophysiological conditions
Source: PubMed Central journal article supplement (PMC5680406; doi:10.1007/s11517-017-1657-3), 2017-06-05
Supplement: 11517_2017_1657_MOESM1_ESM.pdf [file 11517_2017_1657_MOESM1_ESM.pdf]

[Click here to view linked References](#)

## Supplementary material

### Respiration and thermoregulatory equations

To estimate breathing losses, the following formulation has been used [1].

$$q_{bre} = \frac{1}{V_{lung}} [0.0014(m^2/^\circ C)Q_{m,glob}(34 - T_{out}) + 0.0173(m^2/Pa)Q_{m,glob}(5.87 - P_{out})] \quad (1)$$

where  $Q_{m,glob}$  is the global metabolic heat generation rate,  $V_{lung}$  is the lung volume (respectively  $58.2 \text{ W/m}^2$  and  $5631.41 \text{ cm}^3$ ) and  $P_{out}$  is the ambient water vapour pressure.

Both cutaneous vasomotion and shivering are modeled following [1]. The evaluation of vasodilation and vasoconstriction flows ( $\dot{m}_{skin,dil}$  and  $\dot{m}_{skin,con}$ ) for a body segment may be calculated via the following expressions:

$$\begin{cases} \dot{m}_{skin,dil} = \dot{m}_{skin,bas} \text{ kg/s} & \text{if } T_{core} \leq 36.8^\circ C \\ \dot{m}_{skin,dil} = \frac{T_{core}-36.8}{37.2-36.8}(\dot{m}_{skin,max} - \dot{m}_{skin,bas}) + \dot{m}_{skin,bas} \text{ (kg/s)} & \text{if } 36.8^\circ C \leq T_{core} \leq 37.2^\circ C \\ \dot{m}_{skin,dil} = \dot{m}_{skin,max} \text{ kg/s} & \text{if } T_{core} \geq 37.2^\circ C \end{cases} \quad (2)$$

and

$$\begin{cases} \dot{m}_{skin,con} = \dot{m}_{skin,min} \text{ kg/s} & \text{if } T_{skin} \leq 27.8^\circ C \\ \dot{m}_{skin,con} = \frac{T_{skin}-27.8}{33.7-27.8}(\dot{m}_{skin,bas} - \dot{m}_{skin,min}) + \dot{m}_{skin,min} \text{ (kg/s)} & \text{if } 27.8^\circ C \leq T_{skin} \leq 33.7^\circ C \\ \dot{m}_{skin,con} = \dot{m}_{skin,bas} \text{ kg/s} & \text{if } T_{skin} \geq 33.7^\circ C \end{cases} \quad (3)$$

For evaluating shivering contribution, we need at first calculate the shivering temperature,  $T_{shiv}$ ; this variable depends on the core temperature:

$$\begin{cases} T_{shiv} = 35.5^\circ C & \text{if } T_{core} \leq 35.8^\circ C \\ T_{shiv} = -10222 + 570.9 T_{core} - 7.9455 T_{core}^2 \text{ (}^\circ C\text{)} & \\ \text{if } 35.8^\circ C \leq T_{core} \leq 37.1^\circ C & \end{cases} \quad (4)$$

It should be noted that for  $T_{core}$  greater than  $37.1^\circ C$ , shivering does not occur. The maximum increase in total metabolic heat generation caused by shivering ( $Q_{shiv,max}$ ) may be written as

$$Q_{shiv,max} = \frac{1}{3600}(-1.186110^9 + 6.55210^7 T_{core} - 9.041810^5 T_{core}^2) \text{ (W)} \quad (5)$$

The shivering metabolic heat generation  $Q_{shiv}$  may now be calculated as

$$Q_{shiv} = Q_{shiv,max} [1 - (\frac{T_{skin} - 20}{T_{shiv} - 20})^2] \text{ (W) } \text{ if } (40 - T_{shiv}) \leq T_{skin} \leq T_{shiv} \text{ } ^\circ\text{C} \quad (6)$$

In the following we reported the methodology used for describing sweating losses. The sweating threshold  $T_{eva}$  may be approximately expressed as a function of mean skin temperature, i.e.,

$$\begin{cases} T_{eva} = 42.084 - 0.15833 T_{skin} \text{ (}^\circ\text{C)} \\ \text{if } T_{skin} \leq 33.0^\circ\text{C} \\ T_{eva} = 36.85^\circ\text{C if } T_{skin} \geq 33.0^\circ\text{C} \end{cases} \quad (7)$$

The sweat rate  $\dot{m}_{eva}$  may now be evaluated as,

$$\dot{m}_{eva} = \frac{45.8 + 739.4(T_{core} - T_{eva})}{3.6 \cdot 10^6} \text{ (kg/s) } \text{ if } T_{core} > T_{eva} \quad (8)$$

The relative skin wetness  $w$  is given as,

$$w = 0.06 + \frac{\dot{m}_{eva}(1 - 0.06)}{0.000193} \quad (9)$$

The total evaporative heat loss  $q_{eva}$  may now be written as [2],

$$q_{eva} = \frac{w(P_{skin} - P_{out})}{R_{eva,cl} + \frac{1}{f_{cl}h_{eva}}} \text{ (W/m}^2\text{)} \quad (10)$$

where  $P_{skin}$  is water vapour pressure on the skin (normally assumed to be that of saturated water vapour at skin temperature [3]),  $R_{eva,cl}$  is the evaporative heat transfer resistance of the clothing layer,  $f_{cl}$  is the clothing area factor (the surface of the clothed body divided by the area of the bare body), and  $h_{eva}$  is the evaporative heat transfer coefficient (see [4]).

## References

- [1] C. Smith. *A transient, Three Dimensional Model of the Human Thermal System*. PhD thesis, Kansas State University, 1991.
- [2] Refrigerating American Society of Heating and Air-Conditioning Engineers. *Physiological principles and thermal comfort*, 1993.
- [3] P.O. Fanger. *Thermal Comfort*. New York: McGraw-Hill, 1970.
- [4] D.M. Kerslake. *The Stress of Hot Environments*. Cambridge: University Press, 1972.
